# Supplementary material
Source: publisher figshare collection journal article supplement (https://geolsoc.figshare.com/articles/dataset/_/3453038)
Supplement: Supplementary file 1 [file 1]

## Sheet: sed_rates_whole_rock
X	Y	Basin	type	Albsedrate	Albturbres	Albacctypr	Albunc	CenConsedr	CenConturb	CenConacct	CenConunc	SanMaasedr	SanMaaturb	SanMaaunc	SanMaaacct	Palsedrate	Palturb	Palacctype	Palunc	Eosedrate	Eoturbres	Eoacctype	Eounc	Oligsedrat	Oligturbre	Oligacctyp	Oligunc	EMiosedrat	EMioturbre	EMioacctyp	EMiounc	MLMiosedra	MLMioturbr	MLMioaccty	MLMiounc	PlPlsedrat	PlPlturbre	PlPlacctyp	PlPlunc	Confidence	References
0	0	Orange	cross-section	65	TS	P	U-103	75	TS	P	U-93	91	TS	U-80	P	5		R	U-67	5		P		5		A		5		A		5		A		5		A		C	Jungslager, 1999, Geol Soc SP 153, p 11-40
0	0	Kwanza	cross-section	35		A		5		A		5	TS		A	5		A		5		A		36		A	U-34	52	TS	P		63	TS	P	U-MIDMIO	42		P	U-B PL	D	Lunde et al, 1991, Geologie Africaine, Bull Cent Res Elf Aq, 13, 99-117
0	0	Congo Angola	cross-section	67	TS	P		6		A		6			A	6		A	U-B PAL	6		A		15	TS	P	U-34	38	TS	P		88	TS	P	U-MIDMIO	82		P	U-B PL	C	Laville et al, 2001, MArine Geology, 178, 63-80
0	0	Congo Congo	cross-section	55	TS	P		12		A		12			A	12		A		12		A		40		P	U-34	51	TS	P		115	TS	P	U-MIDMIO	30		P	U-B PL	C	Laville et al, 2001, MArine Geology, 178, 63-80
0	0	South Gabon	cross-section	56		A		3		A		3			A	2		A		2		A	U-MID E	6		A	U-34	27		P		26		P	U-BURG	25		P		C	Walgenwitz et al, 1992, Geological Evolution of Atlantic Rises, Am Geophy Union, 20-45
0	0	Ogouee	cross-section	71		P		87		A		23	TS	U-SANT	P	12	TS	P		8		A		7		A	U-34	34	TS	P		34	TS	P		34		P		C	Tiesserenc et al, 1989, AAPG Memoir 48, 117-199
0	0	Gabon Deep		0		A		9		A		9			A	9		A		9		R		18		A	U-34	37		A		30		A		30		A		C	Jackson et al 2008, Bull AAPG, 92,4, 487-511,
0	0	Rio Muni	cross-section	88		A		31		A		10	TS	U-SANT	A	10		A		6		A		6		A	U-34	15		P		15		P		15		P		C	Lawrence et al, 2002, Leading Edge, 21, 11, 1112-1117
0	0	Niger Delta E	cross-section	0		A		8		A		8			A	108		P		108		P		107		P		125	TS	P		247	TS	P		354		P	U-B PL	B	Haack et al, 2000, AAPG Memoir 73, 213-231
0	0	Niger Delta W	cross-section	0		A		16		A		16			A	160		P		160		P		118		P		143	TS	P		254	TS	P		233		P	U-B PL	B	Haack et al, 2000, AAPG Memoir 73, 213-231
0	0	Benin	cross-section	0	TS	A	U	72		A		30	TS	U	P	22		A		22		A		12		A	U	12		P		12		P		12		P		D	Macgregor et al, 2003, Geol Soc SP 201, 131-150
0	0	Togo	cross-section	0		A	U	40		A		9		U	A	9		A		9		A		19		A	U	19		P		19		P		19		P		D	Macgregor et al, 2003, Geol Soc SP 201, 131-150
0	0	Tano	cross-section	68	TS	A	U	48	TS	A		20	TS	U-SANT	P	12		P		12		P		10		A	U	10		P		10		P		10		P		D	Macgregor et al, 2003, Geol Soc SP 201, 131-150
0	0	Ivorian	well	66	TS	A	U	45	TS	P		8	TS	U-SANT	P	8		A		8		A		7		A	U	7		P		7		P		7		P		D	Macgregor et al, 2003, Geol Soc SP 201, 131-150
0	0	Liberia	cross-section	0		P	U	45		P		55			P	16		A		16		A		16		A	U	16		P		16		P		16		P		C	Bennett et al, 2002, Leading Edge, 21, 1118-1124
0	0	Guillocheau N	published est	3		A	U	8		A		19			A	3		A		3		A		3		A		3		A		3		A		3		A		A	F.Guillocheau, pers comm and AAPG ICE presentation, Cape Town, 2009
0	0	Guillocheau C	published est	3		A		3		A		3			A	2		A		3		A		3		A		10		A		6		A		8		A		A	F.Guillocheau, pers comm and AAPG ICE presentation, Cape Town, 2009
0	0	Guillocheau S	published est	12		A		11		A		10			A	14		A		11		A		14		A		25		A		25		A		25		A		A	F.Guillocheau, pers comm and AAPG ICE presentation, Cape Town, 2009
0	0	Luderitz	point	12		A		33		A		37		U	P	0		A	U	0		A		11		A	U	11		A		11		A		11		A		C	Light et al, 1993, Geol Soc SP 71, 163-191
0	0	Walvis	point	33		A		33		A		44		U	P	2		A	U	2		A		7		A	U	7		A		7		A		7		A		C	Light et al, 1993, Geol Soc SP 71, 163-191
0	0	d/w ang 1	point	8		A		3		A		1			A	1				1		A		9		A		9		A		33		A		34		A		C	Seranne et al, 2005, Jl Afr E Sci, 43, 283-300
0	0	d/w ang 2	point	181		A		69		A		3			A	3				3		A		70		A		70		A		48		A		63		A		C	Seranne et al, 2005, Jl Afr E Sci, 43, 283-300
0	0	Cape Oceanic	point	5		A		5		A		5			A	0				0		A		0		A		0		A		0		A		0		A		C	Seranne et al, 2005, Jl Afr E Sci, 43, 283-300
0	0	Keta	cross=section	0				60				28				25		A		20		A		6				29		P		29		P		42		A		C	Kjemperud et al 1992, Geologie Africaine,, Bull Cent Res Elf Aq, 13
0	0	Guinea Bissau	cross-section	30				14				14				14				14				29				29				29				29				D	Dumeste et al, 1995, Oil and Gas J., 83, 36, 180-191
0	0	Gambia	cross-section	37		A		40		A		45			P	45		P		3		A		3				3		A		3		A		3		A		C	Buried Hill Energy cross-section on Petrogambia website
0	0	Zambezi	published est	14			U-119	31	TS	P	U	89	TS		P	17	TSTS	A		17		A	U-50	82		P	U-35	40		P	U-25	58		P		119		P		A	Walford et al, 2005, Earth and Planetary Sci Letters, 238, 49-63
0	0	Limpopo	cross-section	17				17			U	8				3				3				3				9				9				9		P		D	Iliffe et al, 1991, Mar Pet Geol, 8, 152-162
0	0	Outeniqua	published est	20		P	U-103	35			U-83,90	35		U-67	P	5		A		5				5		A		5		A		5		A		5		A		A	Tinker et al, 2008, Tectonophysica, 455, 1-4, 94-103
0	0	Tano	cross-section	29				25	TS	P		19				9				9				9				13				13				13				C	Tari 2006, Houston Geol Soc newsletter, Jan 2006
0	0	Ivorian	well D1-1x	0				10				22				8				8				10				10				10				10				E	Tucker et al 1992, Geologie Africaine,, Bull Cent Res Elf Aq, 13
0	0	Zambezi	seismic	79				35				35				35				29				19				52				52				63				C	Salman et al, 1995, Sed Geol, 96, 1-2, 7-41
0	0	Zambezi	geoseismic	0				0				30				24				22				44				49				30				83				C	Walford et al, 2005, Earth and Planetary Sci Letters, 238, 49-63
0	0	Congo	published est	51		P		37		P		9			A	3		A		3				33		P		45		P		45		P		98		P		A	Leturmy et al, 2003, Jl Geophy Res, 108, 8, ETG 8-1
0	0	Kwanza	cross-section	0		A		9		A		9				9		A		9				25		A		36		A		36		P	U-mid Mio	125		P	U	B	Marton et al, 2000, in Mohriak, ed, Atlantic Rifts and Cont Margins, Am Geophy Union, 129-149
0	0	Congo	cross-section	0				13				13				13				13				53				9				9				72				C	Marton et al, 2000, in Mohriak, ed, Atlantic Rifts and Cont Margins, Am Geophy Union, 129-149
0	0	Rio Muni	cross-section	35				35				24		U 84-	P	5		A		5				15		A	U	15		A	U	18		P		45				C	Dailly et al, 2006, Houston Geol Soc newsletter, June 2006
0	0	Orange	isopach map	60				76				44				1				1				1				1				10				10				A	R. Brown, pers comm
0	0	Walvis	seismic line	5				8				15				15				15				15				15				16				17			U	C	Holtart et al, 2000, AAPG Memoir 73, Chapter 29
0	0	Liberia	geoseismics	0				23		P		23		U	P	9		A		9				12		A		8		A		8		A		33		P		B	www.searchanddiscovery.net/documents/2004/flinch/images/flinch.pdf
0	0	Sierra Leone	cross-section	0				40	TS			30				23		P		6				13				13				18				18				C	Grand, PESGB Africa Conference abstracts CD, 2009
0	0	Frio	representative	0				0				0				6				7				10				13				13				16				E	Dingle, 1983 , Mesozoic and Tertiary Geology of Southern Africa, AA Balkema
0	0	Cape Basin	representative	0				0				11				3				14				5				7				7				3				E	Dingle, 1983 , Mesozoic and Tertiary Geology of Southern Africa, AA Balkema
0	0	Agulhas	representative	0				0				26				21				18				0				4				4				4				E	Dingle, 1983 , Mesozoic and Tertiary Geology of Southern Africa, AA Balkema
0	0	Orange	representative	57				106				75				0				10				2				7				7				7				E	Dingle, 1983 , Mesozoic and Tertiary Geology of Southern Africa, AA Balkema
0	0	Tugela	representative	0				0			U	25		U		22				28				10			U	8				8				7			U	E	Dingle, 1983 , Mesozoic and Tertiary Geology of Southern Africa, AA Balkema
0	0	Limpopo	representative	0				0				10				7				7				32				11				11				9				E	Dingle, 1983 , Mesozoic and Tertiary Geology of Southern Africa, AA Balkema
0	0	Bredasdorp	representative	32				19				23				1				1				1				1				1				1				E	Dingle, 1983 , Mesozoic and Tertiary Geology of Southern Africa, AA Balkema
0	0	Pletmos	representative	28				12				11				1				1				1				1				1				1				E	Dingle, 1983 , Mesozoic and Tertiary Geology of Southern Africa, AA Balkema
0	0	Zululand	representative	27				18				19				1				1				1			U	1			U	1				1			U	E	Dingle, 1983 , Mesozoic and Tertiary Geology of Southern Africa, AA Balkema
0	0	LImpopo	cross-section	29				41				41				8				8				8				15				15				15				D	www.inp-mz.com
0	0	Tano	cross-section	16				23	TS	P		3		U-Sant	P	5		A		5				5		A	U	7		A		7		A		7		A		C	www.interoil.com
